# Supplementary material
Source: PubMed Central journal article supplement (PMC2480559)
Supplement: ijcep0001-0157-SD3.pdf [file ijcep0001-0157-SD3.pdf]

## Supplementary Table 1: Description of Seizure Grades

| SEIZURE GRADE | PHENOTYPE                                                                                                                                                      | LATENCY TIME CRITEREA                                                                                                            |
|---------------|----------------------------------------------------------------------------------------------------------------------------------------------------------------|----------------------------------------------------------------------------------------------------------------------------------|
| 0             | No change in behavior.                                                                                                                                         | N/A                                                                                                                              |
| 1             | Progressive decrease in motor activity until the mouse comes to rest in a crouched or prone position with abdomen in full contact with the bottom of the cage. | Time at which the mouse rests abdomen on bottom of cage after period of hypoactivity.                                            |
| 2             | Twitches.                                                                                                                                                      | Time of first whole body twitch (head to tail hiccup).                                                                           |
| 3             | Mouse falls but recovers. Grade 3 seizures are fully developed minimal seizures with clonus of the head muscles and forelimbs. The righting reflex is present. | Time of first fall or when the head and shoulders are hunched and the mouse would fall if not supported by the side of the cage. |
| 4             | Falls and stays down. Grade 4 seizures are major seizures involving a fall and exhibiting forelimbs that are parallel to the body axis and stiff.              | Time of fall (mouse does not right self) and forelimbs are parallel to the body axis and stiff.                                  |
| 5             | Major seizure resulting in death. There is hyperactive bouncing followed by a fall and clonus of all four limbs that leads to death.                           | Time of onset of WRJ (wild running and jumping).                                                                                 |
